# Supplementary material
Source: PubMed Central journal article supplement (PMC10851989)
Supplement: NIHPP2023.03.27.534286V4-supplement-1.pdf [file NIHPP2023.03.27.534286V4-supplement-1.pdf]

**494 Table S1: MM3 parameter values for processed external datasets.** Parameters which were changed from the default values are **495** shaded in yellow. Ollion et al., Jug et al. and Sachs et al. datasets were segmented with the non-learning method, while the Lugagne **496** et al. dataset was segmented using the U-Net method.

|                 |                                    | Default value | Ollion et al. | Lugagne et al. | Jug et al. | Sachs et al. |
|-----------------|------------------------------------|---------------|---------------|----------------|------------|--------------|
| <b>Compile</b>  | Channel width (px)                 | 10            | 20            | 10             | 10         | 10           |
|                 | Channel separation (px)            | 45            | 90            | 45             | 45         | 45           |
| <b>Subtract</b> | Align pad (px)                     | 10            | 10            | 10             | 10         | 10           |
| <b>Segment</b>  | 1st opening (px)                   | 2             | 3             | N/A            | 3          | 3            |
|                 | Distance threshold (px)            | 2             | 3             | N/A            | 3          | 3            |
|                 | 2nd opening (px)                   | 1             | 2             | N/A            | 1          | 2            |
|                 | Otsu threshold scale               | 1             | 1.2           | N/A            | 1.0        | 1.0          |
|                 | Min object size (px <sup>2</sup> ) | 25            | 25            | 25             | 25         | 25           |
| <b>Track</b>    | Growth length ratio (min, max)     | (0.8, 1.3)    | (0.9, 1.5)    | (0.8, 1.3)     | (0.8, 1.3) | (0.8, 1.3)   |
|                 | Growth area ratio (min, max)       | (0.8, 1.3)    | (0.9, 1.5)    | (0.8, 1.3)     | (0.8, 1.3) | (0.8, 1.3)   |
|                 | Lost cell time (frames)            | 3             | 3             | 3              | 3          | 3            |
|                 | New cell y cutoff (px)             | 150           | 300           | 150            | 150        | 150          |

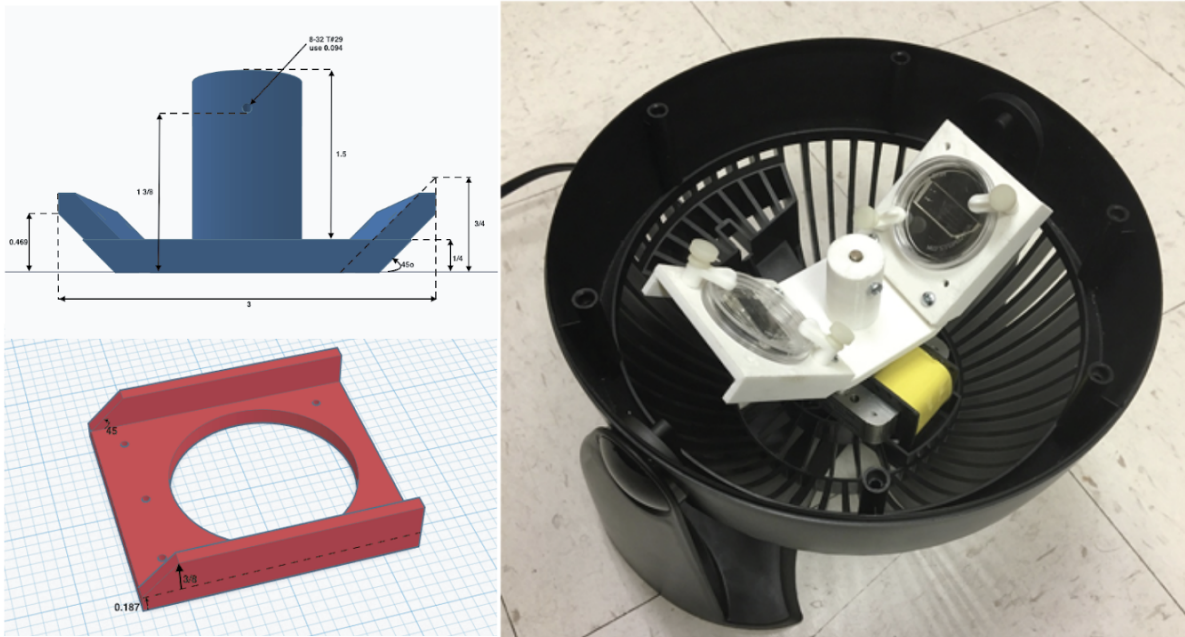

601

**602 Figure S1. Inexpensive fabrication of cell loader with 3D printing.**

603 An inexpensive device for loading cells into the mother machine. The construction involves 3D printing a custom holder/  
604 rotor for a 50mm WillCo dish, on which a mother machine is attached. The holder is printed in three parts (2 blades and a  
605 central base) to account for 3D printers with small printing areas. This piece is then assembled and secured to a  
606 Honeywell fan from which the original blade has been removed. CAD files and details of the fan centrifuge construction  
607 are available at [28].

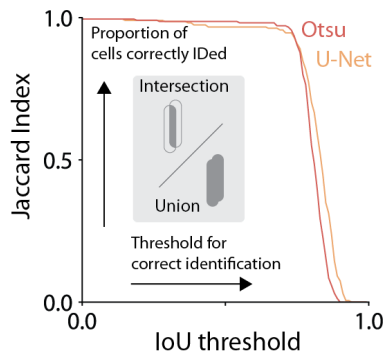

608

609 **Figure S2: Evaluating segmentation output of napari-MM3 Otsu and U-Net methods**

610 To evaluate the quality of the segmentation masks generated by MM3's Otsu and U-Net segmentation methods, we  
611 computed the Jaccard index [42,51] as a function of the intersection-over-union (IoU) threshold.

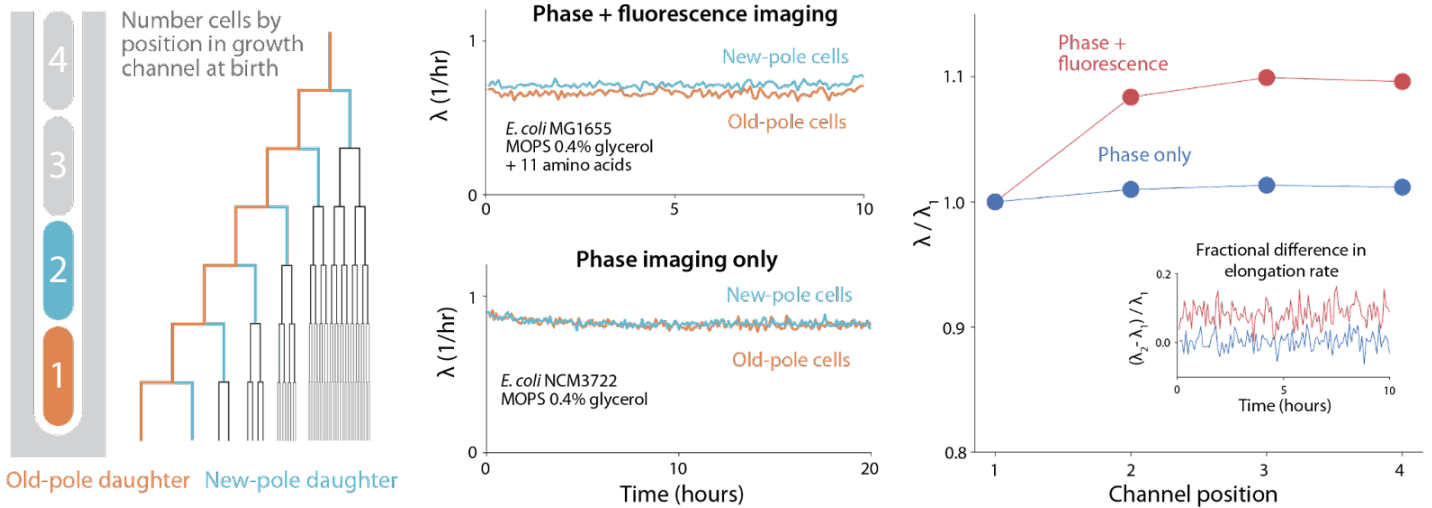

612

**613 Figure S3: Old-pole aging phenotype is strain specific.** Cells imaged with fluorescence often show signs of aging in the  
 614 old-pole “mother” cell. For instance, in the dataset analyzed in Figure 4 (*E. coli* MG1655 with the fluorescent protein YPet fused  
 615 to DnaN), we observed systematic differences in cell elongation rate and size between the old-pole cell at the end of the growth  
 616 channel and its sisters, which inherit the new pole (top center). However, this asymmetry is not universal. Using napari-MM3’s  
 617 Otsu segmentation method, we re-analyzed previously published data obtained without fluorescence illumination [32], and found  
 618 that the old-pole and new-pole cell elongation rates varied only on the order of 1% (lower center), while in the dataset obtained  
 619 under fluorescence imaging, the old-pole mother cells grow 7-10% slower than the new pole cells. Cells born third or fourth from  
 620 the closed end of the channel also grow slower than the old-pole mother (right). The asymmetry in growth rate between old-pole  
 621 and new pole cells persists across time (right, inset). These results are consistent with a previous survey [63], which found that  
 622 most evidence for aging in *E. coli* comes from studies utilizing fluorescent proteins for visualization.

623
